# Supplementary material
Source: publisher figshare collection journal article supplement (https://karger.figshare.com/ndownloader/files/26663720)
Supplement: Supplementary file 1 [file 26663720]

Figure Legends Supplementary Material

Figure S 1. Theoretical model showing the core category and their contributing categories from psychosocial adaptation of patient with CSD

Figure S 2. Item analysis flowchart
